# Supplementary material
Source: publisher site journal article supplement (https://www.dovepress.com/article/595923)
Supplement: Supplementary file 1 [file supplementary%20materials.docxe]

**Exploratory analyses of additional frequency bands**

To examine whether the reported time-frequency effects were specific to frontal theta activity, additional exploratory analyses were conducted for the alpha and beta bands using the same frontal/fronto-central electrode cluster (F1, Fz, F2, FC1, FCz, FC2). For the alpha band (10-13 Hz), mean power was extracted from the 300-550 ms time window. No significant main effects or interactions were observed (all *ps* > .05). For the beta band (18-22 Hz), mean power was extracted from the 250-500 ms time window. A significant main effect of Electrode was observed, F (5, 735) = 66.304, *p* < .001, =.312, but no significant main effects of Group or Task Type, and no significant interactions involving these factors, were found (all *ps* > .05). These exploratory results suggest that the critical time-frequency effect reported in the main text was not paralleled in the examined alpha or beta bands.

**Supplementary Figure S1**


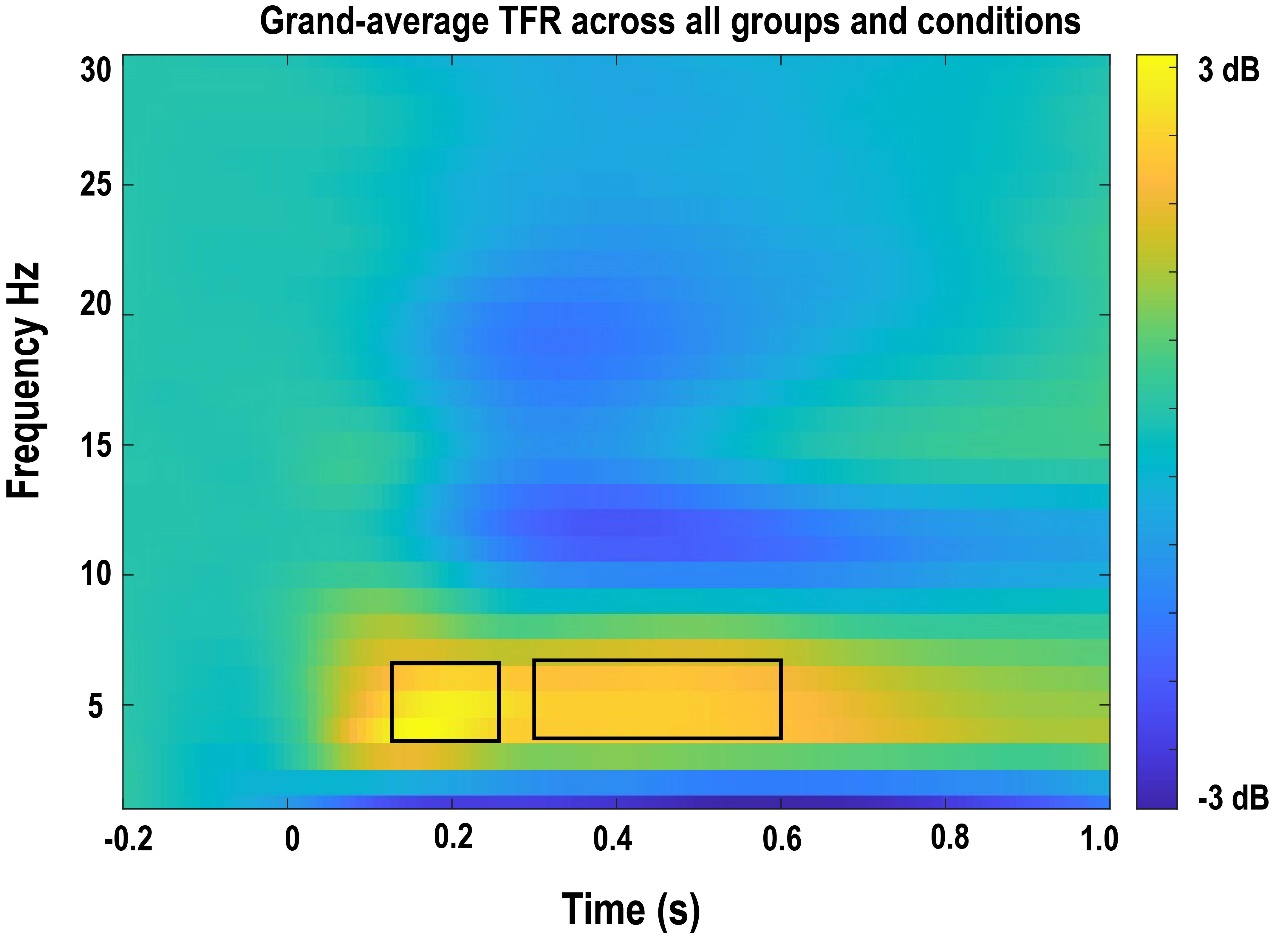


**Supplementary Figure S1.** Grand-average time-frequency representation across all groups and conditions at the frontal/fronto-central electrode cluster (F1, Fz, F2, FC1, FCz, FC2), used to guide the selection of the theta-band time windows. Grand-average time-frequency representation across all groups and conditions at the frontal/fronto-central electrode cluster (F1, Fz, F2, FC1, FCz, FC2). Visual inspection of this grand-average plot was used to guide the selection of the theta-band time windows (130-260 ms and 300-600 ms).
